# Supplementary material
Source: PubMed Central journal article supplement (PMC4974111)
Supplement: mmc1.pdf [file mmc1.pdf]

**Supplemental Data**

**Mutations in *DNAJB13*, Encoding an HSP40 Family Member,  
Cause Primary Ciliary Dyskinesia and Male Infertility**

**Elma El Khouri, Lucie Thomas, Ludovic Jeanson, Emilie Bequignon, Benoit Vallette, Philippe Duquesnoy, Guy Montantin, Bruno Copin, Florence Dastot-Le Moal, Sylvain Blanchon, Jean François Papon, Patrick Lorès, Li Yuan, Nathalie Collot, Sylvie Tissier, Catherine Faucon, Gérard Gacon, Catherine Patrat, Jean Philippe Wolf, Emmanuel Dulioust, Bruno Crestani, Estelle Escudier, André Coste, Marie Legendre, Aminata Touré, and Serge Amselem**

Figure S1

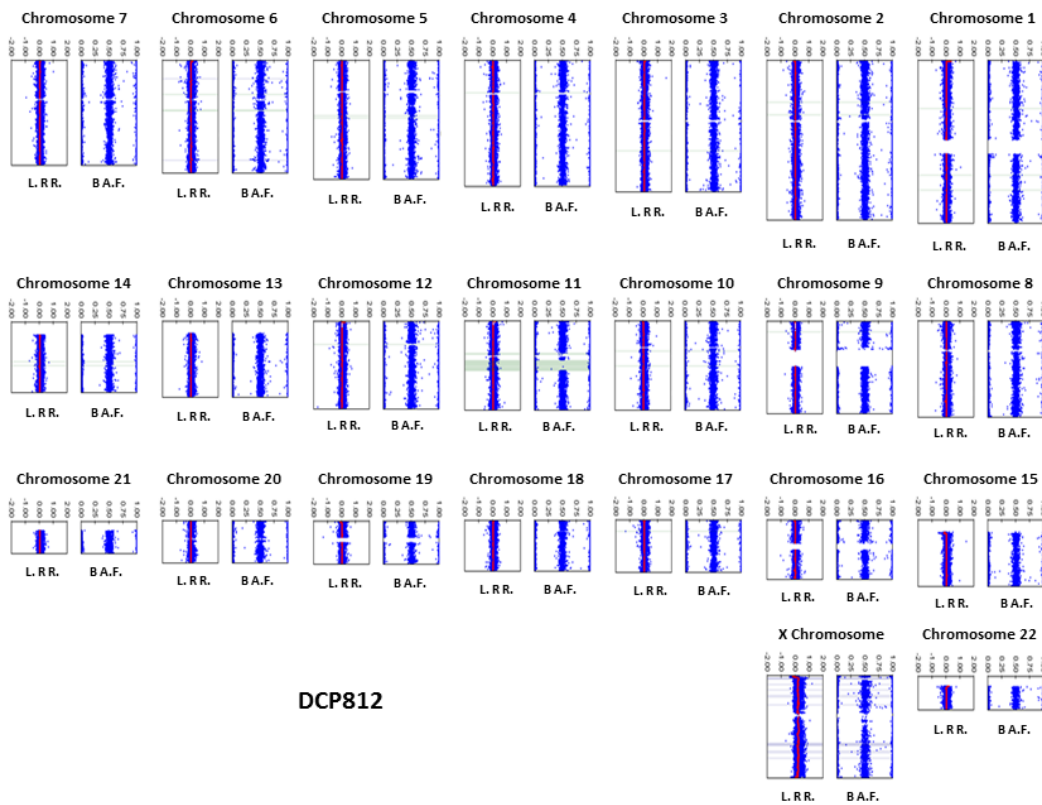

Figure S1. Whole-Genome SNP Genotyping in Individual DCP812

DCP812 was genotyped with the HumanCytoSNP-12 chip from Illumina and the data were analyzed with the Genome Studio and CNV partition 3.1.6 softwares (Illumina). Each blue dot represents one individual single-nucleotide polymorphism (SNP). For each chromosome, the right panel shows the B allele frequency (B A. F.). For each SNP, a low B allele frequency indicates that the individual is homozygous for the A allele; intermediate values mean that they are heterozygous, and a high B allele frequency means that they are homozygous for the B allele. Regions of homozygosity larger than 100 kb are shaded in green. The *DNAJB13* mutation of individual DCP812 is localized in a large region of homozygosity of chromosomal region 11q13.4 (16.4 Mb). For each chromosome, the left panel represents the log R ratio (L. R. R.), which is the log ratio of observed probe density to expected probe density. A null L. R. R. indicates the absence of loss or gain of material.

**Figure S2**

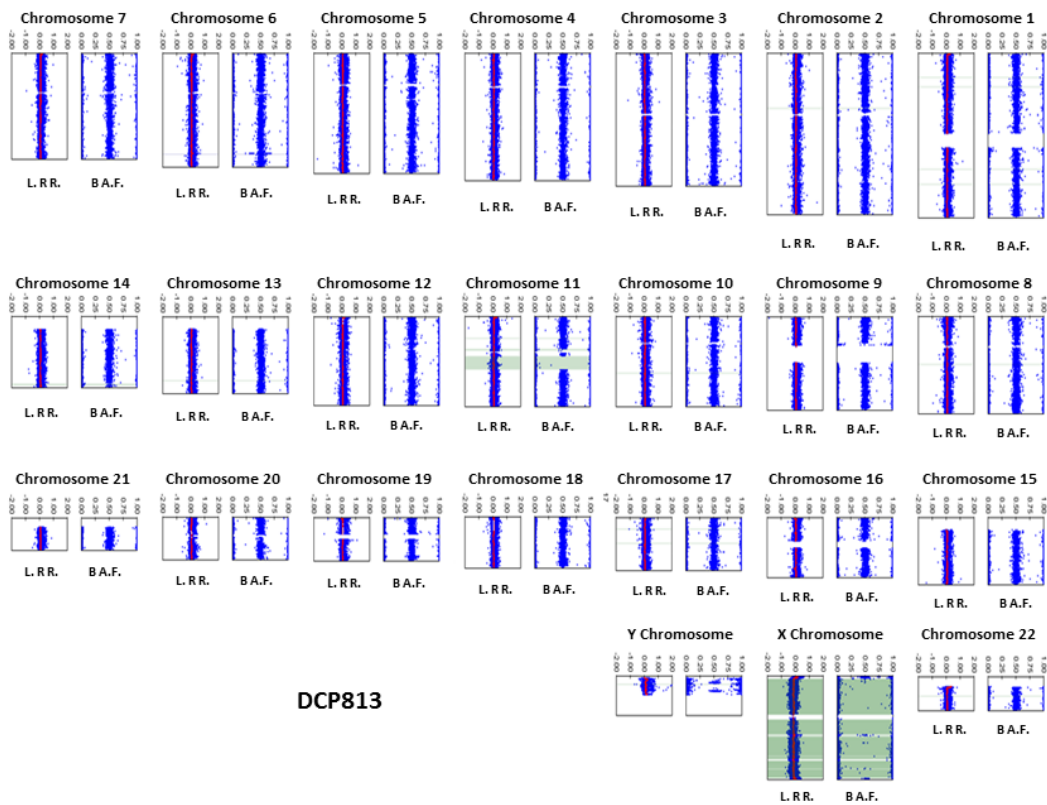

**Figure S2. Whole-Genome SNP Genotyping in Individual DCP813**

DCP813 was genotyped with the HumanCytoSNP-12 chip from Illumina and the data were analyzed with the Genome Studio and CNV partition 3.1.6 softwares (Illumina). Each blue dot represents one individual single-nucleotide polymorphism (SNP). For each chromosome, the right panel shows the B allele frequency (B A. F.). For each SNP, a low B allele frequency indicates that the individual is homozygous for the A allele; intermediate values mean that they are heterozygous, and a high B allele frequency means that they are homozygous for the B allele. Regions of homozygosity larger than 100 kb are shaded in green. The *DNAJB13* mutation of individual DCP813 is localized in a large region of homozygosity of chromosomal region 11q13.4 (20.7 Mb). For each chromosome, the left panel represents the log R ratio (L. R. R.), which is the log ratio of observed probe density to expected probe density. A null L. R. R. indicates the absence of loss or gain of material.



**Figure S3. Protein Sequence Alignment of the DNAJ\_C Domain from DNAJB13 with its Close Paralogs, and Structural Organization of the DNAJ\_C Domain of DNAJB1 in which Leu302, corresponding to Met278 of DNAJB13 was replaced by a Methionine Residue, as Modeled from the Crystal Structure of the DNAJ\_C Domain from DNAJB1.**

(A) The multiple sequence alignment, using Clustal Omega software, demonstrates the high homology between the DNAJ\_C domain of human DNAJB13 and its close paralogs DNAJB4, DNAJB1 and DNAJB5. The Met278, Leu148, Leu230 and Leu252 residues in DNAJB13 (corresponding to Leu302, Leu172, Val254 and Leu276, respectively, in DNAJB1) are indicated by a red arrow. The colors of the residues correspond to their physicochemical properties; red: small + hydrophobic (including aromatic -Y); blue: acidic; magenta: basic – H; green: hydroxyl + sulfhydryl + amine + G. \*: identical residues in all sequences; :: residues sharing similar properties in all sequences.

(B) Predicted 3D structure of the DNAJ\_C domain of DNAJB1 carrying a methionine residue at position 302, as modeled from the crystal structure of the DNAJ\_C domain of wild-type DNAJB1 (Agx). Leu302, corresponding to Met278 in DNAJB13 (see A panel), was replaced by a methionine residue using Modeller 9.10 and PROCHECK for validation. Left panel: the secondary structure is colored according to the following code: beta-sheets in red, alpha helices in orange, and loops in yellow. Right panel: magnification of the region of interest. Residues are represented with sticks. Oxygen, nitrogen, sulfur and hydrogen atoms are shown in red, blue, dark yellow and grey, respectively. Amino acid residues (carbon atoms of the lateral chain) are colored according to the following code: the methionine residue of interest is in yellow; the non-polar residues in close proximity to that methionine (i.e. Leu172, Val254 and Leu276) are in black; the other non-polar residues are in grey; the neutral polar and charged polar residues are in purple and in green, respectively.

Figure S4

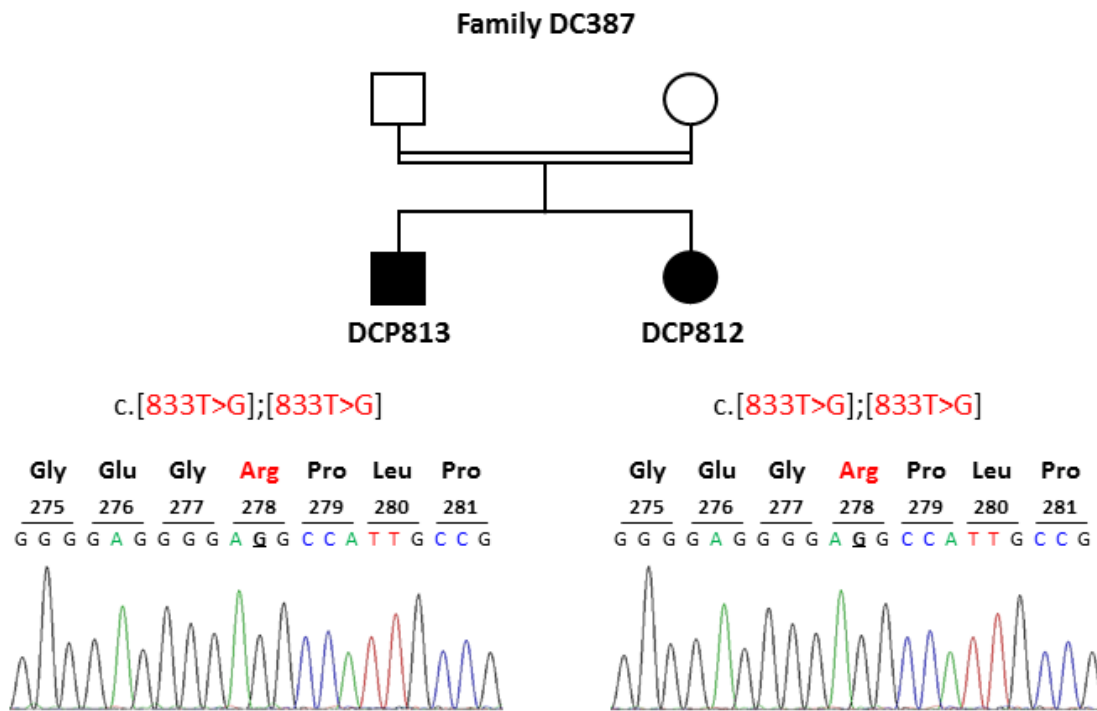

**Figure S4. Sanger Sequencing Showing the *DNAJB13* c.833T>G (p.Met278Arg) Mutation Identified in Individuals DCP812 and DCP813 (Family DC387)**

Direct sequencing of amplified genomic DNA was performed to validate the mutation previously identified by whole-exome sequencing. The mutation is present in the homozygous state, as deduced from homozygosity mapping data (see Figure S1).

**Figure S5**

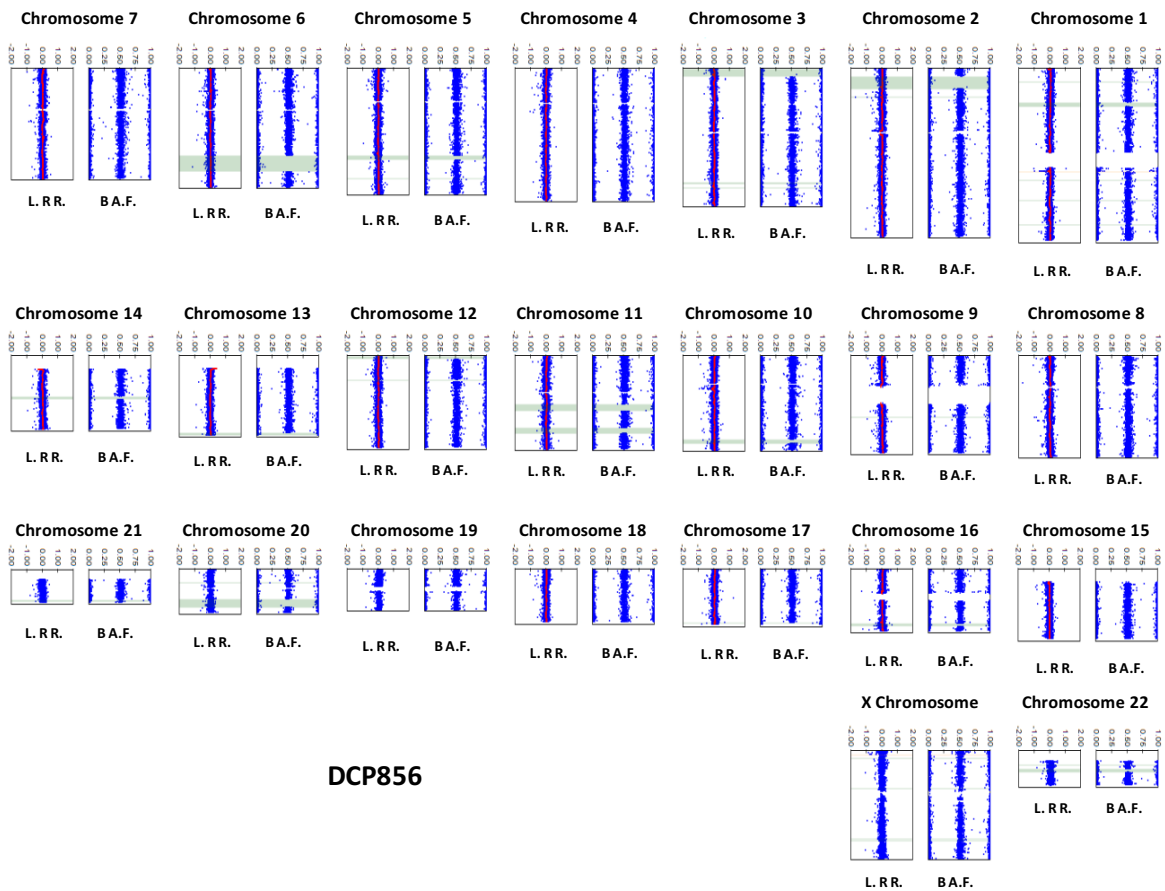

**Figure S5. Whole-Genome SNP Genotyping in Individual DCP856**

DCP856 was genotyped with the HumanCytoSNP-12 chip from Illumina and the data were analyzed with the Genome Studio and CNV partition 3.1.6 softwares (Illumina) designed to identify homozygous regions. Each blue dot represents one individual single-nucleotide polymorphism (SNP). For each chromosome, the right panel shows the B allele frequency (B.A.F.). For each SNP, a low B allele frequency indicates that the individual is homozygous for the A allele; intermediate values mean that they are heterozygous, and a high B allele frequency means that they are homozygous for the B allele. Regions of homozygosity larger than 100 kb are shaded in green. The *DNAJB13* mutation of individual DCP856 is localized in a region of homozygosity of chromosomal region 11q13.4 (10.4 Mb). For each chromosome, the left panel represents the log R ratio (L.R.R.), which is the log ratio of observed probe density to expected probe density. A null L.R.R. indicates the absence of loss or gain of material.

Figure S6

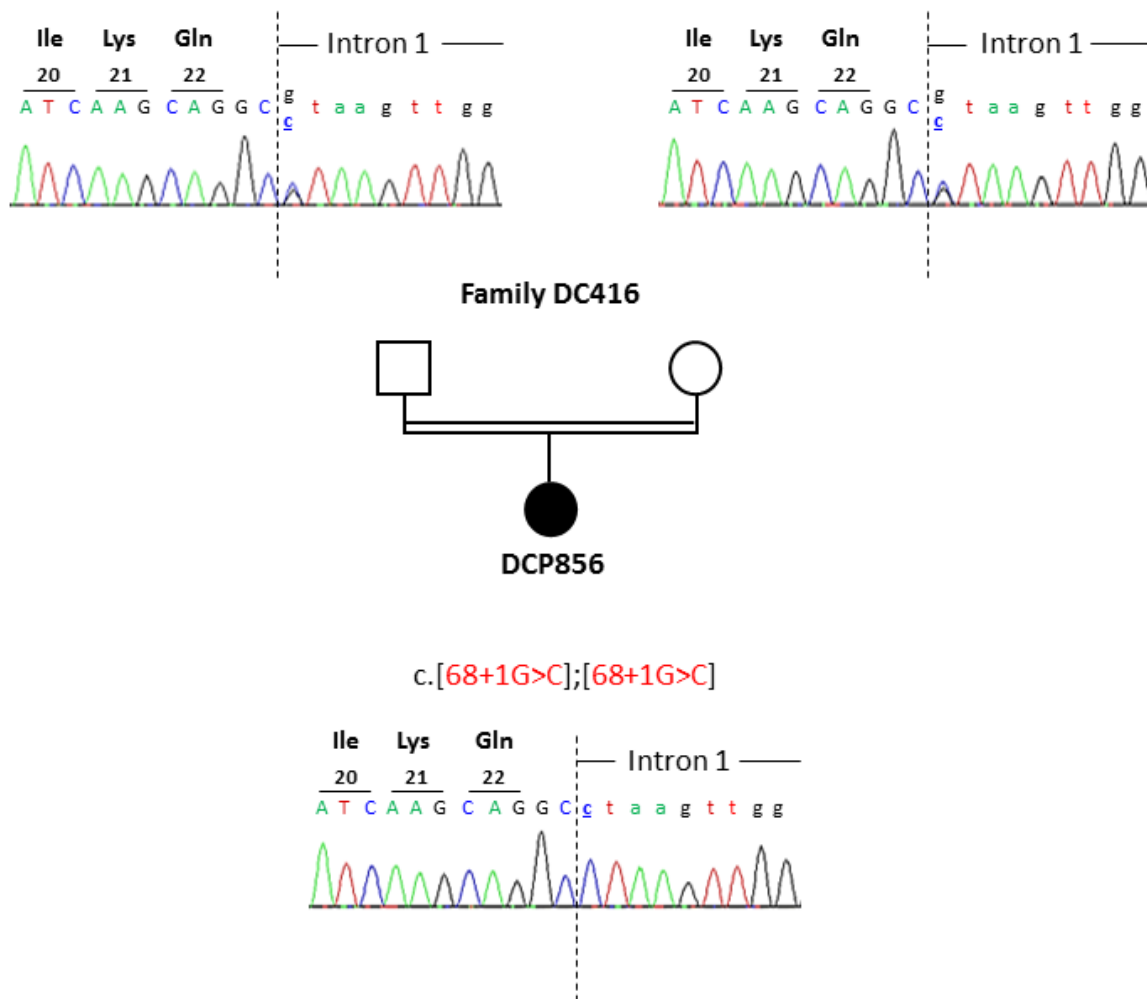

**Figure S6. Sanger Sequencing Showing the *DNAB13* c.68+1G>C Mutation Identified in Individual DCP856 (Family DC416)**

Direct sequencing of amplified genomic DNA was performed to validate the mutation previously identified by whole-exome sequencing. The mutation is present in the homozygous state, both unaffected parents carrying the mutation in the heterozygous state.



**Figure S7**

**A**

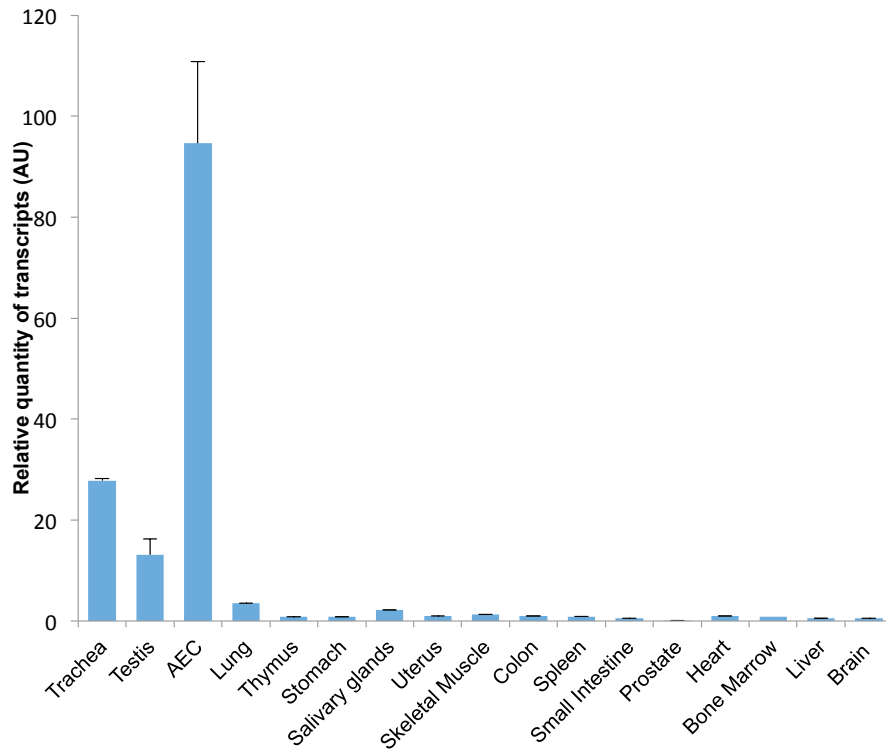

**B**

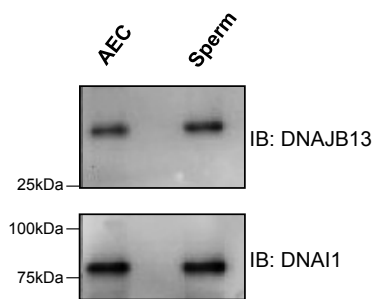

**C**

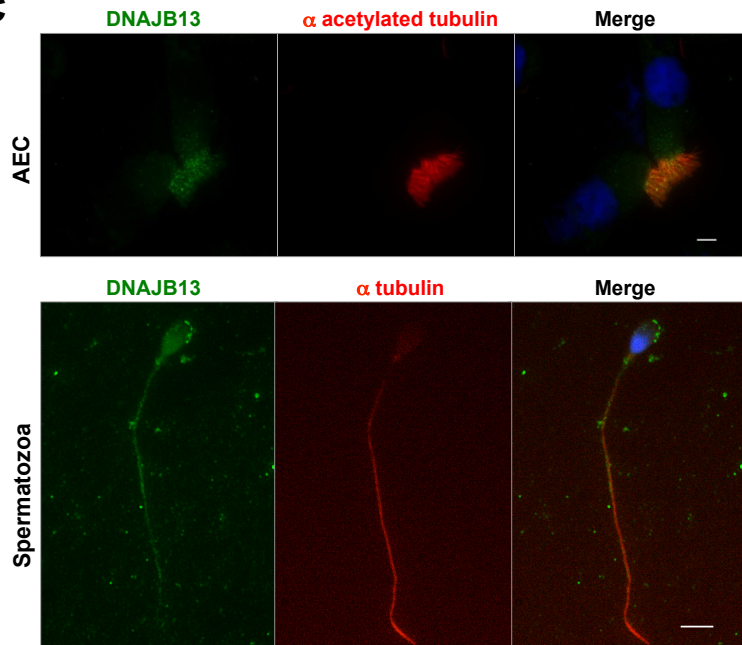

**Figure S7. Expression Pattern of Human *DNAJB13* and Localization of DNAJB13 protein in the Axoneme of Human Cilia and Flagella**

(A) Expression analysis of *DNAJB13*, as assessed by quantitative RT-PCR. The ubiquitously expressed *ERCC3* gene was used as internal control; values are the mean  $\pm$  SD of two independent experiments. *DNAJB13* transcripts are found at highest levels in the trachea, testis and airway epithelial cells (AEC). (B) Western blot analysis showing the detection of DNAJB13 protein in human AEC and sperm. (C) Immunofluorescence assays performed on human AEC and spermatozoa show DNAJB13 co-localization with  $\alpha$ -Tubulin in cilia and flagella, respectively. Scale bars represent 5  $\mu$ m.

Figure S8

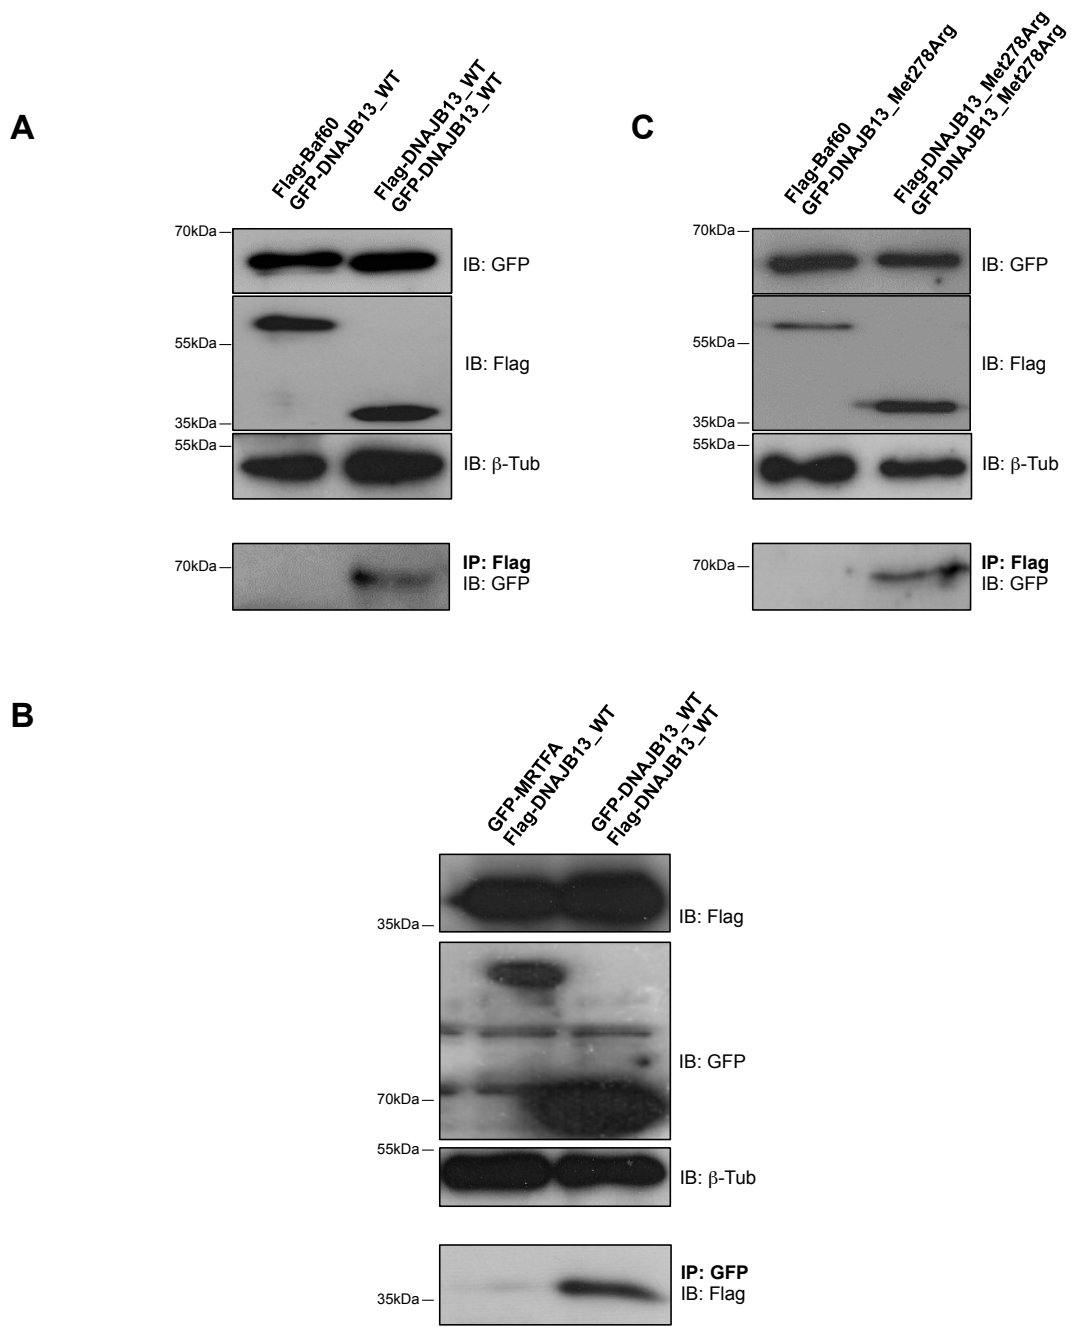

**Figure S8. Impact of the DNAJB13 p.Met278Arg Mutation on the Homodimerization state of DNAJB13**

**(A)** CHO-K1 cells were transiently co-transfected with plasmids encoding the GFP-DNAJB13 WT and the Flag-DNAJB13 WT proteins or the Flag-Baf60 protein used as a negative control. After 24 hours, the proteins were extracted and immunoprecipitation was performed using an anti-Flag antibody. The upper panel shows protein levels of Flag and GFP tagged DNAJB13 prior to immunoprecipitation.  $\beta$ -tubulin was used as a loading control. The lower panel shows the detection of GFP-DNAJB13 upon immunoprecipitation (IP Flag). The results presented are representative of 3 independent experiments.

**(B)** The same experiment described in (A) was conducted using the DNAJB13 p.Met278Arg mutant protein.

**(C)** CHO-K1 cells were transiently co-transfected with plasmids encoding the Flag-DNAJB13 WT and the GFP-DNAJB13 WT proteins or the GFP-MRTFA protein used as a negative control. After 24 hours, the proteins were extracted and immunoprecipitation was performed using an anti-GFP antibody. The upper panel shows the detection of Flag and GFP tagged DNAJB13 proteins prior to immunoprecipitation.  $\beta$ -tubulin was used as a loading control. The lower panel shows the detection of Flag-DNAJB13 after immunoprecipitation (IP GFP).

**Figure S9**

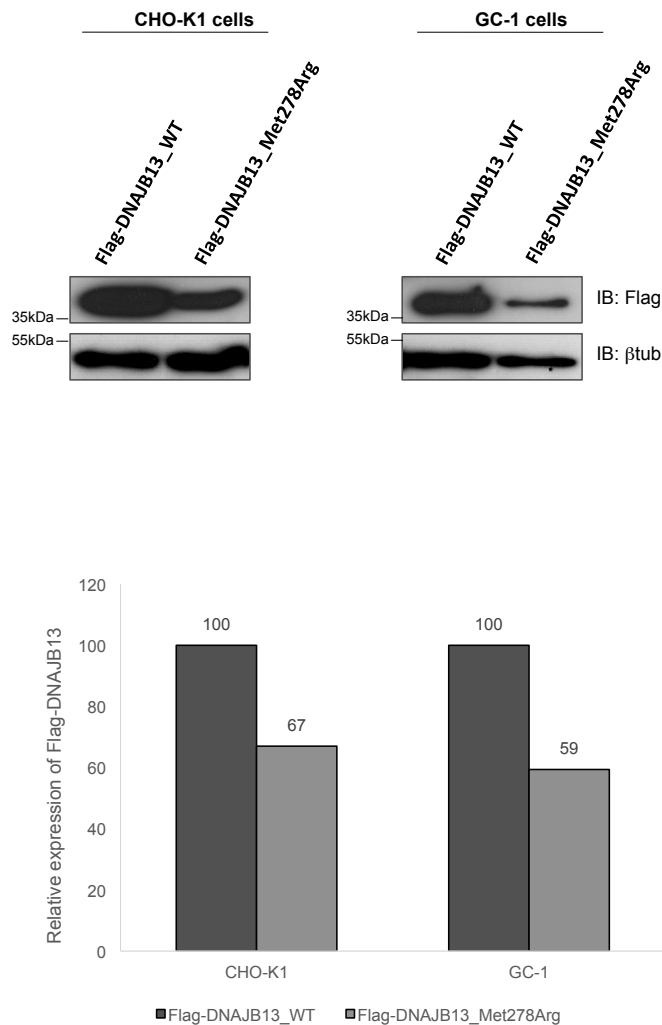

**Figure S9. Impact of the DNAJB13 p.Met278Arg Mutation on DNAJB13 protein levels in CHO-K1 and GC-1 cells**

**Upper panel:** CHO-K1 cells and GC-1 cells were transiently transfected with 0.5 $\mu$ g of the plasmids encoding for the Flag-DNAJB13\_WT and Flag-DNAJB13\_Met278Arg proteins. After 24 hours, the proteins were extracted and equal amounts of protein extracts were subjected to SDS-PAGE using 14% gels and immunoblotted with an anti-Flag antibody.  $\beta$ -tubulin was used as a loading control. **Bottom panel:** The Flag signal was quantified using ImageJ software and normalized to the  $\beta$ -tubulin levels. Results are expressed as a percentage of the wild-type condition.

Figure S10

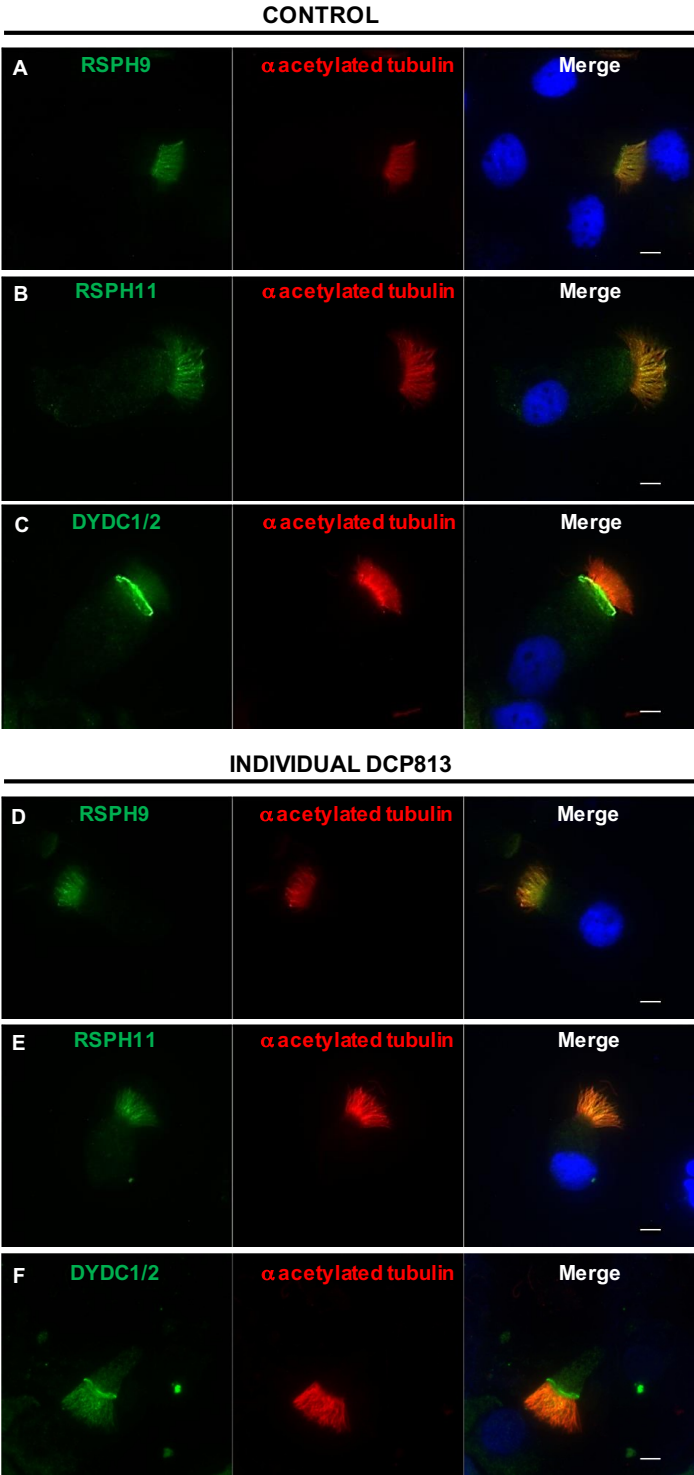

**Figure S10. Localization of Ciliary Proteins in Airway Epithelial Cells from a Healthy Control Individual and Individual DCP813**

RSPH9 (A,D), RSPH11 (B,E) and DYDC1/2 (C,F) proteins were detected by immunofluorescence assays in airway epithelial cells from both control individual and individual DCP813. Scale bars represent 5  $\mu$ m

Figure S11

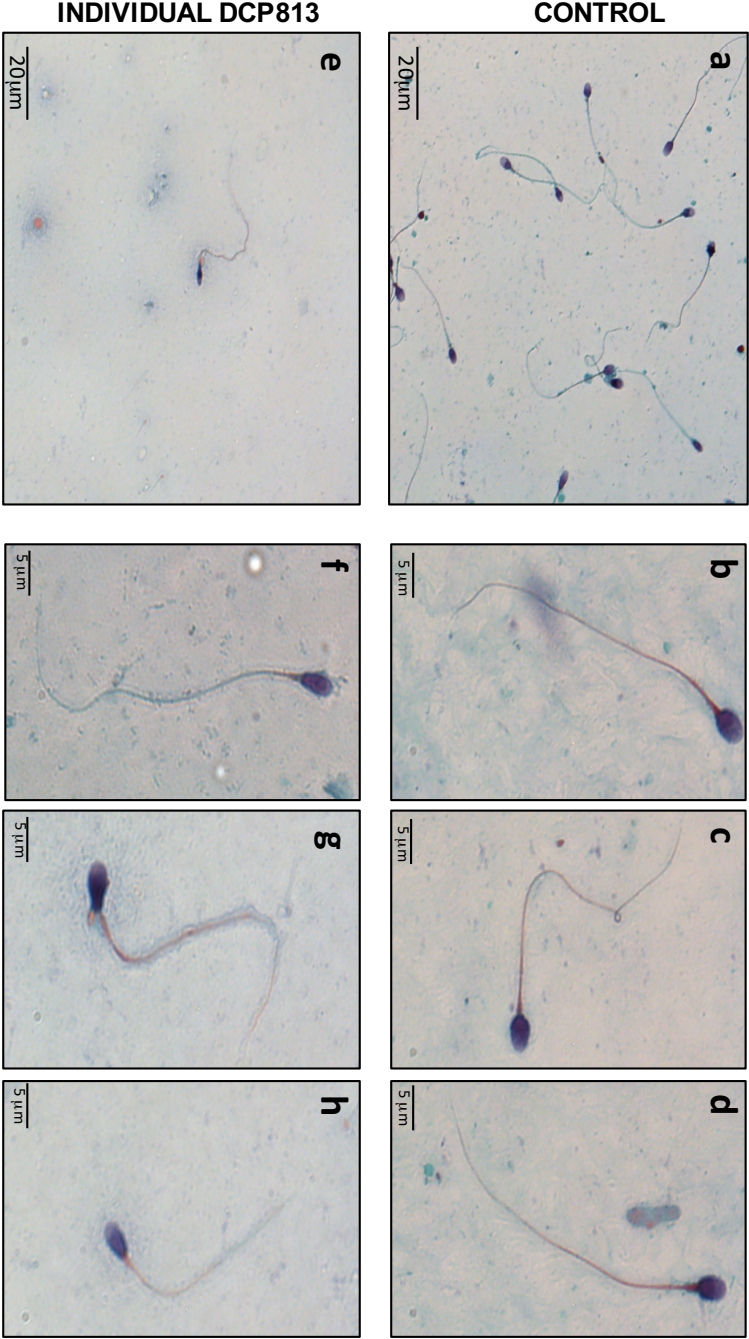



### **Figure S11. Morphology of Sperm Cells from Individual DCP813**

Semen sample of individual DCP813 was obtained by masturbation and sperm morphology was assessed by Giemsa staining according to the guidelines of the World Health Organization (WHO). In contrast to control individual, spermatozoa from individual DCP813 displayed irregular length and caliber of the flagellum and abnormal head morphology. Scale bars represent 5  $\mu\text{m}$ .

**Table S1. Genomic Coordinates of the Homozygous Region Shared by Individuals DCP812 and DCP813**

| #Chromosome | Start           | - | End             | Size (bp)       |
|-------------|-----------------|---|-----------------|-----------------|
| 1           | 95324989        | - | 96056161        | 731172          |
| 1           | 175824793       | - | 176837770       | 1012977         |
| 1           | 187832345       | - | 188751379       | 919034          |
| 1           | 198066364       | - | 199585917       | 1519553         |
| 2           | 55719226        | - | 56198400        | 479174          |
| 2           | 79225689        | - | 79561647        | 335958          |
| 2           | 102294192       | - | 102698603       | 404411          |
| 2           | 129899375       | - | 130405841       | 506466          |
| 2           | 213597626       | - | 214135709       | 538083          |
| 5           | 20947355        | - | 21896196        | 948841          |
| 5           | 23722769        | - | 24137389        | 414620          |
| 5           | 41560078        | - | 42530101        | 970023          |
| 5           | 112312527       | - | 112947049       | 634522          |
| 6           | 44980340        | - | 45368796        | 388456          |
| 6           | 151264777       | - | 151443654       | 178877          |
| 7           | 68963428        | - | 69699073        | 735645          |
| 9           | 72992109        | - | 73406550        | 414441          |
| 11          | 48238178        | - | 49609842        | 1371664         |
| 11          | 49811224        | - | 51392715        | 1581491         |
| <b>11</b>   | <b>59543331</b> | - | <b>76011095</b> | <b>16467764</b> |
| 14          | 66632180        | - | 67258961        | 626781          |
| 14          | 102451982       | - | 103232424       | 780442          |
| 15          | 74551602        | - | 75142760        | 591158          |
| 15          | 80719357        | - | 81079332        | 359975          |
| 16          | 31151520        | - | 31664746        | 513226          |
| 17          | 15314879        | - | 16322363        | 1007484         |
| 17          | 46543805        | - | 47047561        | 503756          |
| 18          | 11192144        | - | 11700533        | 508389          |
| 19          | 11284538        | - | 11988970        | 704432          |
| 19          | 23446278        | - | 23774941        | 328663          |
| 21          | 31416459        | - | 31859573        | 443114          |
| 22          | 20040601        | - | 20059762        | 19161           |

Genomic coordinates are based on GRCh37.

The homozygous region containing the *DNAJB13* c.833T>G transversion is in bold characters.

**Table S2. Gene Variants Identified in the Regions of Homozygosity Shared by Individuals DCP812 and DCP813**

| Gene                  | Chr       | ExAC allele frequency | Variation          | RefSeq             | known or presumed function, or involvement in other diseases <sup>a</sup> |
|-----------------------|-----------|-----------------------|--------------------|--------------------|---------------------------------------------------------------------------|
| <i>CPSF7</i>          | 11        | 0.000008              | p.Ile285Val        | NM_001136040.2     | mRNA cleavage factor complex                                              |
| <i>ATL3</i>           | 11        | 0.000008              | p.Gly97Asp         | NM_015459.4        | involved in neuropathy, hereditary sensory, 1F (OMIM: 615632)             |
| <i>SF3B2</i>          | 11        | 0.006                 | p.Ala26Ser         | NM_006842.2        | mRNA splicing, via spliceosome                                            |
| <i>BBS1</i>           | 11        | 0.0008                | p.Glu79Lys         | NM_024649.4        | involved in Bardet-Biedl syndrome 1 (OMIM: 209900)                        |
| <i>GPR152</i>         | 11        | ND                    | p.Arg240Lys        | NM_206997.1        | angiotensin receptor activity                                             |
| <b><i>DNAJB13</i></b> | <b>11</b> | <b>ND</b>             | <b>p.Met278Arg</b> | <b>NM_153614.3</b> | <b>radial spoke protein</b>                                               |
| <i>C2CD3</i>          | 11        | 0.000016              | p.Ile1463Asn       | NM_001286577.1     | involved in orofaciodigital syndrome 14 (OMIM: 615948)                    |
| <i>GPR137</i>         | 11        | ND                    | p.Ala12-Ala17del   | NM_020155.3        | G protein-coupled receptor                                                |

ND: not described

<sup>a</sup>None of the corresponding genes is known as a ciliary component or as involved in ciliogenesis, except (i) *BBS1* whose mutations are known to be responsible for Bardet-Biedl syndrome (a ciliopathy affecting primary cilia) and (ii) ***DNAJB13*** (bold characters) that encodes a radial spoke protein, which is an axonemal component of motile cilia. In addition, except for *DNAJB13*, none of those genes has an expression pattern compatible with an involvement in PCD.

**Table S3. Genomic Coordinates of Homozygous Regions in Individual DCP856**

| #Chromosome | Start     | - | End       | Size (bp) |
|-------------|-----------|---|-----------|-----------|
| 1           | 11711702  | - | 12034087  | 322385    |
| 1           | 18532882  | - | 20015268  | 1482386   |
| 1           | 47870884  | - | 55031201  | 7160316   |
| 1           | 57042109  | - | 57747785  | 705676    |
| 1           | 147305744 | - | 147467750 | 162006    |
| 1           | 150863667 | - | 151455674 | 592007    |
| 1           | 159913448 | - | 161588657 | 1675209   |
| 1           | 188651759 | - | 190163376 | 1511617   |
| 1           | 215632104 | - | 216324363 | 692259    |
| 1           | 223649439 | - | 224775021 | 1125582   |
| 1           | 227157714 | - | 227954960 | 797246    |
| 2           | 10401064  | - | 29401030  | 19063913  |
| 2           | 40601509  | - | 41692511  | 1091002   |
| 2           | 70859897  | - | 71556090  | 696193    |
| 2           | 108904520 | - | 109254118 | 349598    |
| 2           | 127902158 | - | 128887775 | 985617    |
| 2           | 145320381 | - | 146060703 | 740322    |
| 2           | 158814505 | - | 159382868 | 568363    |
| 2           | 166934393 | - | 167329181 | 394788    |
| 2           | 200339085 | - | 200962201 | 623116    |
| 2           | 231632550 | - | 232254553 | 622003    |
| 3           | 45895     | - | 11811386  | 11765491  |
| 3           | 78378354  | - | 79273601  | 895247    |
| 3           | 152709902 | - | 153383552 | 67365     |
| 3           | 163486967 | - | 164764164 | 1277197   |
| 3           | 165054700 | - | 166381935 | 1327235   |
| 3           | 171339701 | - | 172581582 | 1241881   |
| 3           | 192818155 | - | 193338191 | 520036    |
| 5           | 24943196  | - | 25404582  | 461386    |
| 5           | 57381625  | - | 57793140  | 411515    |
| 5           | 125139262 | - | 132383046 | 7243784   |
| 5           | 157990400 | - | 159062800 | 1072400   |
| 6           | 63112895  | - | 63460098  | 347203    |
| 6           | 81072168  | - | 81913384  | 841216    |
| 6           | 90745318  | - | 91162617  | 417299    |
| 6           | 101025383 | - | 101812944 | 787561    |
| 6           | 125164430 | - | 148724116 | 23559692  |
| 7           | 6186568   | - | 6951596   | 765028    |

|           |                 |   |                 |                 |
|-----------|-----------------|---|-----------------|-----------------|
| 7         | 53317406        | - | 54108376        | 79097           |
| 7         | 100806741       | - | 101137488       | 330747          |
| 8         | 49445299        | - | 49985036        | 539737          |
| 8         | 90951107        | - | 91861528        | 910415          |
| 8         | 96255831        | - | 96600147        | 344316          |
| 8         | 96787742        | - | 97129891        | 342149          |
| 8         | 115087798       | - | 115927695       | 839897          |
| 9         | 72216660        | - | 72783686        | 567026          |
| 9         | 74087091        | - | 74983264        | 896173          |
| 9         | 87293981        | - | 88332725        | 1038744         |
| 10        | 12634442        | - | 13248069        | 613627          |
| 10        | 43755252        | - | 44130635        | 375383          |
| 10        | 46392146        | - | 47122505        | 680359          |
| 10        | 83168887        | - | 83594713        | 425826          |
| 10        | 119401787       | - | 126195527       | 6793740         |
| <b>11</b> | <b>69406566</b> | - | <b>79770063</b> | <b>10394578</b> |
| 11        | 102998306       | - | 111542764       | 8544458         |
| 11        | 128278623       | - | 128782488       | 503865          |
| 12        | 68102           | - | 4865481         | 4797379         |
| 12        | 25698575        | - | 26114012        | 415437          |
| 12        | 33536102        | - | 34659435        | 1123333         |
| 12        | 116049664       | - | 116496774       | 44711           |
| 13        | 110152789       | - | 114125098       | 3752208         |
| 14        | 48287010        | - | 48848293        | 561283          |
| 14        | 51680166        | - | 52064081        | 383915          |
| 14        | 53451764        | - | 53877291        | 425527          |
| 14        | 58200220        | - | 62971495        | 4771275         |
| 15        | 31473108        | - | 32013879        | 540771          |
| 15        | 32027625        | - | 32902602        | 874977          |
| 15        | 43225829        | - | 43761920        | 536091          |
| 15        | 68498107        | - | 68971549        | 473442          |
| 16        | 9746268         | - | 10057711        | 311443          |
| 16        | 77172009        | - | 77456908        | 284899          |
| 16        | 78232754        | - | 82587790        | 4355036         |
| 17        | 2840415         | - | 3344645         | 50423           |
| 17        | 13145462        | - | 13480289        | 334827          |
| 17        | 17662182        | - | 18503445        | 841263          |
| 17        | 34610560        | - | 35339248        | 728688          |
| 17        | 40229318        | - | 40812023        | 582448          |
| 17        | 76938238        | - | 78640854        | 1723922         |
| 18        | 48439467        | - | 49222971        | 783504          |
| 20        | 17814344        | - | 19413907        | 1599563         |
| 20        | 22440606        | - | 22926973        | 486367          |
| 20        | 23067766        | - | 23630133        | 562367          |

|    |          |   |          |         |
|----|----------|---|----------|---------|
| 20 | 30793776 | - | 31164056 | 37028   |
| 20 | 42275207 | - | 52077175 | 9801975 |
| 20 | 52081775 | - | 54964194 | 2882419 |
| 21 | 14487585 | - | 14692803 | 205218  |
| 21 | 14821268 | - | 15052304 | 231036  |
| 21 | 29020037 | - | 29830125 | 810088  |
| 21 | 42755622 | - | 45583147 | 2876166 |
| 22 | 19654308 | - | 20786675 | 1132367 |
| 22 | 26076118 | - | 31092937 | 5016819 |

---

Genomic coordinates are based on GRCh37.

The homozygous region containing the *DNAJB13* c.68+1G>C transversion is in bold characters.

**Table S4. Gene Variants Identified in the Regions of Homozygosity in Individual DCP856**

| Gene                  | Chr       | ExAC allele frequency | Variation                                  | RefSeq             | known or presumed function, or involvement in other diseases <sup>a</sup> |
|-----------------------|-----------|-----------------------|--------------------------------------------|--------------------|---------------------------------------------------------------------------|
| <i>DMRTA2</i>         | 1         | ND                    | p.Ala396_Ala398del                         | NM_032110.2        | involved in dorsal telencephalon and sex differentiation                  |
| <i>DMRTB1</i>         | 1         | 0.0007                | p.Glu339Gly                                | NM_033067.1        | involved in sex differentiation                                           |
| <i>SLC22A5</i>        | 5         | ND                    | c.952-2A>G (splice_acceptor_variant)       | NM_003060.3        | involved in systemic primary carnitine deficiency (OMIM: 212140)          |
| <i>KRTAP5-8</i>       | 11        | ND                    | p.Ser12_Gly13insGlyCysGlyGlyCysGlySer      | NM_021046.2        | hair keratin associated protein                                           |
| <b><i>DNAJB13</i></b> | <b>11</b> | <b>ND</b>             | <b>c.68+1G&gt;C (splice_donor_variant)</b> | <b>NM_153614.2</b> | <b>radial spoke protein</b>                                               |
| <i>SERPINH1</i>       | 11        | 0.00016               | p.Thr189Ala                                | NM_001235.3        | involved in osteogenesis imperfecta 10 (OMIM: 613848)                     |
| <i>GDAP1L1</i>        | 20        | ND                    | p.Arg127Gln                                | NM_001256737.1     | glutathione transferase that translocates into mitochondria               |
| <i>OCSTAMP</i>        | 20        | ND                    | p.Pro2Ser                                  | NM_080721.1        | involved in osteoclast bone resorption                                    |

ND: not described

<sup>a</sup>None of the corresponding genes is known as a ciliary component or as involved in ciliogenesis, except *DNAJB13* (bold characters) that encodes a radial spoke protein, which is an axonemal component of motile cilia. In addition, except for *DNAJB13*, none of those genes has an expression pattern compatible with an involvement in PCD.
